# Supplementary material
Source: HighWire-hosted journal article supplement (https://erj.ersjournals.com/content/60/3/2101684)
Supplement: inline-supplementary-material-1 [file inline-supplementary-material-1.pdf]

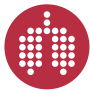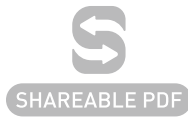

# Improved prediction of asthma exacerbations by measuring distal airway inflammation

Emmanouil Paraskakis <sup>1</sup>, Evangelia Sarikloglou <sup>2</sup>, Sotirios Fouzas <sup>3</sup>, Paschalis Steiropoulos <sup>2,4</sup>, Aggelos Tsalkidis <sup>2,5</sup> and Andrew Bush <sup>6,7</sup>

<sup>1</sup>Paediatric Respiratory Unit, Dept of Paediatrics, Heraklion University Hospital, University of Crete Medical School, Heraklion, Greece. <sup>2</sup>Medical School, Democritus University of Thrace, Alexandroupolis, Greece. <sup>3</sup>Paediatric Respiratory Unit, University Hospital of Patras, Patras, Greece. <sup>4</sup>Dept of Pneumonology, Medical School, Democritus University of Thrace, Alexandroupolis, Greece. <sup>5</sup>Dept of Paediatrics, Medical School, Democritus University of Thrace, Alexandroupolis, Greece. <sup>6</sup>Dept of Paediatrics, National Heart and Lung Institute, London, UK. <sup>7</sup>Dept of Paediatric Respiratory Medicine, Royal Brompton Hospital, London, UK.

Corresponding author: Emmanouil Paraskakis (eparaska@uoc.gr)

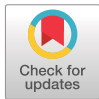

Shareable abstract (@ERSpublications)

Partitioning exhaled nitric oxide allows improved prediction of risk of an asthma attack in the subsequent 4 months.  $C_{alvNO} > 7$  ppb was highly specific for a subsequent exacerbation, while  $C_{alvNO} < 4$  ppb excluded risk of an attack with high specificity. <https://bit.ly/3zWZWYp>

**Cite this article as:** Paraskakis E, Sarikloglou E, Fouzas S, *et al.* Improved prediction of asthma exacerbations by measuring distal airway inflammation. *Eur Respir J* 2022; 60: 2101684 [DOI: 10.1183/13993003.01684-2021].

This single-page version can be shared freely online.

Copyright ©The authors 2022.  
For reproduction rights and  
permissions contact  
permissions@ersnet.org

This article has an editorial  
commentary:  
[https://doi.org/10.1183/  
13993003.00802-2022](https://doi.org/10.1183/13993003.00802-2022)

Received: 14 June 2021  
Accepted: 5 Jan 2022

## Abstract

**Introduction** Partitioning parameters measured from exhaled nitric oxide, such as the alveolar concentration of nitric oxide ( $C_{alvNO}$ ), may provide better predictors of future asthma exacerbation than exhaled nitric oxide fraction at an expiratory flow rate of  $50 \text{ mL} \cdot \text{s}^{-1}$  ( $F_{ENO_{50}}$ ). We aimed to determine whether any partitioned nitric oxide parameters were more closely associated than  $F_{ENO_{50}}$  with subsequent asthma exacerbations.

**Methods** 68 asthmatic children (mean $\pm$ SD age  $9.0 \pm 2.4$  years) were followed prospectively (134 visits) and exacerbations were recorded. Childhood Asthma Control Test (cACT), spirometry,  $F_{ENO_{50}}$ ,  $C_{alvNO}$ , bronchial flux of nitric oxide ( $J_{awNO}$ ), transfer factor of nitric oxide ( $D_{awNO}$ ) and airway wall concentration of nitric oxide ( $C_{awNO}$ ) were measured.

**Results** No exacerbation was recorded in 99 visits (Group 1) and an exacerbation was recorded in 35 visits (Group 2). The median (range)  $F_{ENO_{50}}$ ,  $J_{awNO}$ ,  $C_{alvNO}$ ,  $D_{awNO}$  and  $C_{awNO}$  of Group 1 versus Group 2: 12.7 (4–209) versus 13.5 (3.8–149.9) ppb, 715 (10–12 799) versus 438 (40–7457)  $\text{pL} \cdot \text{s}^{-1}$ , 3.4 (0.2–10.8) versus 5.2 (1.7–23.6) ppb, 38.3 (0.2–113.3) versus 38 (1.3–144.5)  $\text{pL} \cdot \text{s}^{-1} \cdot \text{ppb}^{-1}$  and 26.8 (4.1–2163) versus 29.9 (5.5–3054) ppb, respectively. Other than for  $C_{alvNO}$  ( $p < 0.001$ ), there was no difference between the two groups.  $C_{alvNO} > 7$  ppb predicted asthma exacerbation with specificity 90.9% and positive likelihood ratio (LR) 3.1. Conversely,  $C_{alvNO} < 4$  ppb excluded an exacerbation with sensitivity 71.4% and negative LR 0.48. An increase of  $C_{alvNO}$  by 0.5 ppb between visits could also predict an exacerbation with sensitivity 92%, specificity 92%, positive LR 11.8 and negative LR 0.08.

**Conclusions** Assessment of  $C_{alvNO}$  improved prediction of subsequent exacerbation, highlighting the importance of distal inflammation in asthma outcomes in children.
